# Supplementary material for: Bubble Wrap-like Carbon-Coated Rattle-Type silica@silicon Nanoparticles as Hybrid Anode Materials for Lithium-Ion Batteries via Surface-Protected Etching
Source: MDPI journal article supplement (doi:10.3390/batteries10020053), 2024-02-01
Supplement: s1 [file s1]

Archive with 1 entries (1 files):
- batteries-2769639-supplementary.pdf
