# Supplementary material for: Bubble Wrap-like Carbon-Coated Rattle-Type silica@silicon Nanoparticles as Hybrid Anode Materials for Lithium-Ion Batteries via Surface-Protected Etching
Source: MDPI journal article supplement (doi:10.3390/batteries10020053), 2024-02-01
Supplement: s1 [file s1 › batteries-2769639-supplementary.pdf]

## Supplementary Materials

### **Bubble Wrap-like Carbon-Coated Rattle-Type silica@silicon Nanoparticles as Hybrid Anode Materials for Lithium-Ion Batteries via Surface-Protected Etching**

Angelica Martino <sup>1</sup>, Jiyun Jeon <sup>2</sup>, Hyun-Ho Park <sup>1</sup>, Hochun Lee <sup>2</sup>, and  
Chang-Seop Lee <sup>1,\*</sup>

<sup>1</sup>Department of Chemistry, Keimyung University, Daegu 42601, Republic of Korea  
angelicamartino97@kmu.kr (A.M.); rubchem@kmu.ac.kr (H.-H.P.)

<sup>2</sup>Department of Energy Science and Engineering, DGIST, Daegu 42988, Republic of Korea  
jiyun1234@dgist.ac.kr (J.J.); dukelee@dgist.ac.kr (H.L.)

\*Corresponding author: Chang-Seop Lee

Department of Chemistry, Keimyung University, Daegu 42601, Republic of Korea

Phone No: +82-53-580-5192; Fax No: +82-53-580-5056

E-mail: surfkm@kmu.ac.kr

## List of Figures

|                   |                                                                                                                                                                                                                                                                                                                |    |
|-------------------|----------------------------------------------------------------------------------------------------------------------------------------------------------------------------------------------------------------------------------------------------------------------------------------------------------------|----|
| <b>Figure S1</b>  | FE-SEM image of (a) pure Si nanoparticles. (b) FT-IR result comparing pure Si nanoparticles and Si–OH after piranha solution pre-treatment.                                                                                                                                                                    | 5  |
| <b>Figure S2</b>  | (a) Formation of siloxane networks from piranha-treated Si–OH using APTES. (b) Hydrolysis and (c) condensation reaction mechanism of TEOS showing formation of siloxane bridges.                                                                                                                               | 5  |
| <b>Figure S3</b>  | XPS survey scan of TEOS–SiO <sub>2</sub> @Si and APTES/TEOS–SiO <sub>2</sub> @Si precursors.                                                                                                                                                                                                                   | 6  |
| <b>Figure S4</b>  | XRD patterns of (a) Si and (b) TEOS-derived SiO <sub>2</sub> @Si and APTES/TEOS-derived SiO <sub>2</sub> @Si.                                                                                                                                                                                                  | 6  |
| <b>Figure S5</b>  | XRD reference peaks for face-centered cubic Si crystal (Reference code 98-065-2265)                                                                                                                                                                                                                            | 7  |
| <b>Figure S6</b>  | TEM images showing carbon crosslinking from PEI and PDA carbon coating efficiency in (a, b) composite samples prepared via traditional SiO <sub>2</sub> sol-gel synthesis reaction and carbon coating at room temperature and (c, d) composite samples prepared via hydrothermal treatment at 140 °C for 24 h. | 8  |
| <b>Figure S7</b>  | XPS survey spectra of PVP–SiO <sub>2</sub> @Si and Si nanoparticles.                                                                                                                                                                                                                                           | 9  |
| <b>Figure S8</b>  | XPS survey spectra core shell PDA–PEI@SiO <sub>2</sub> @Si and yolk shell PDA–PEI@SiO <sub>2</sub> @Si composite samples.                                                                                                                                                                                      | 10 |
| <b>Figure S9</b>  | Illustration of the two possible reaction mechanisms showing the formation of PDA–PEI carbon crosslinks.                                                                                                                                                                                                       | 11 |
| <b>Figure S10</b> | XPS survey spectra core shell PDA@SiO <sub>2</sub> @Si and yolk shell PDA–PEI@PVP–SiO <sub>2</sub> @Si composite samples.                                                                                                                                                                                      | 12 |
| <b>Figure S11</b> | Raman peak fitting of core shell PDA@SiO <sub>2</sub> @Si composite sample.                                                                                                                                                                                                                                    | 13 |
| <b>Figure S12</b> | Raman peak fitting of yolk shell PDA–PEI@SiO <sub>2</sub> @Si composite sample.                                                                                                                                                                                                                                | 13 |
| <b>Figure S13</b> | Raman peak fitting of yolk shell PDA–PEI@PVP–SiO <sub>2</sub> @Si composite sample.                                                                                                                                                                                                                            | 14 |

|                   |                                                                                                                                                                                                                                                                                                                                                                                                                                                                   |    |
|-------------------|-------------------------------------------------------------------------------------------------------------------------------------------------------------------------------------------------------------------------------------------------------------------------------------------------------------------------------------------------------------------------------------------------------------------------------------------------------------------|----|
| <b>Figure S14</b> | Raman peak fitting of core shell PDA-PEI@SiO <sub>2</sub> @Si composite sample.                                                                                                                                                                                                                                                                                                                                                                                   | 14 |
| <b>Figure S15</b> | CV scans of core shell PDA-PEI@TEOS-SiO <sub>2</sub> @Si composite fabricated via RT using TEOS as precursor solution.                                                                                                                                                                                                                                                                                                                                            | 15 |
| <b>Figure S16</b> | Galvanostatic charge and discharge profiles of core shell PDA@SiO <sub>2</sub> @Si (a), core shell PDA-PEI@SiO <sub>2</sub> @Si (b), core shell PDA-PEI@PVP-SiO <sub>2</sub> @Si (c), and yolk shell PDA-PEI@SiO <sub>2</sub> @Si (d) composite samples.                                                                                                                                                                                                          | 15 |
| <b>Figure S17</b> | Representative SEM images showing the surface morphology of particles in (a, b) yolk shell PDA-PEI@PVP-SiO <sub>2</sub> @Si, (c, d) yolk shell PDA-PEI@SiO <sub>2</sub> @Si, (e, f) core shell PDA-PEI@PVP-SiO <sub>2</sub> @Si, (g, h) core shell PDA-PEI@SiO <sub>2</sub> @Si, and (i, j) core shell PDA@SiO <sub>2</sub> @Si anode (a, c, e, g, i) before and (b, d, f, h, j) after 200 lithiation/delithiation cycles at 1 A g <sup>-1</sup> current density. | 16 |

## List of Tables

|                 |                                                                                                                                                            |    |
|-----------------|------------------------------------------------------------------------------------------------------------------------------------------------------------|----|
| <b>Table S1</b> | The $I_D/I_G$ values of the samples calculated by the ratio of the D band peak area to the G band peak area using Gaussian–Lorentzian curve fitting model. | 17 |
| <b>Table S2</b> | The porous structure of the representative composite samples described by BJH model of BET analysis.                                                       | 18 |

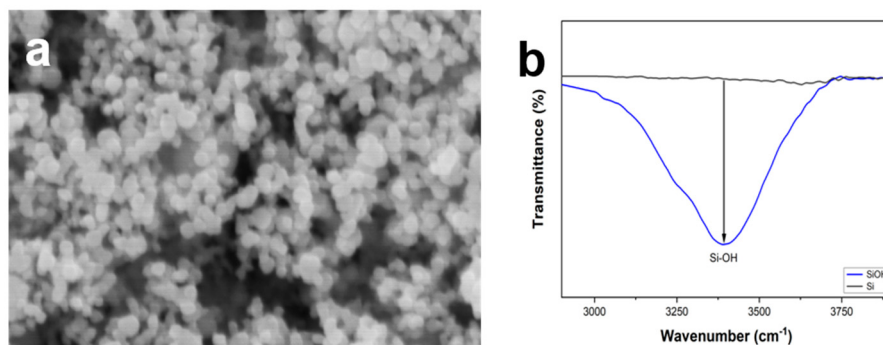

**Figure S1.** FE-SEM image of (a) pure Si nanoparticles. (b) FT-IR result comparing pure Si nanoparticles and Si-OH after piranha solution pre-treatment.

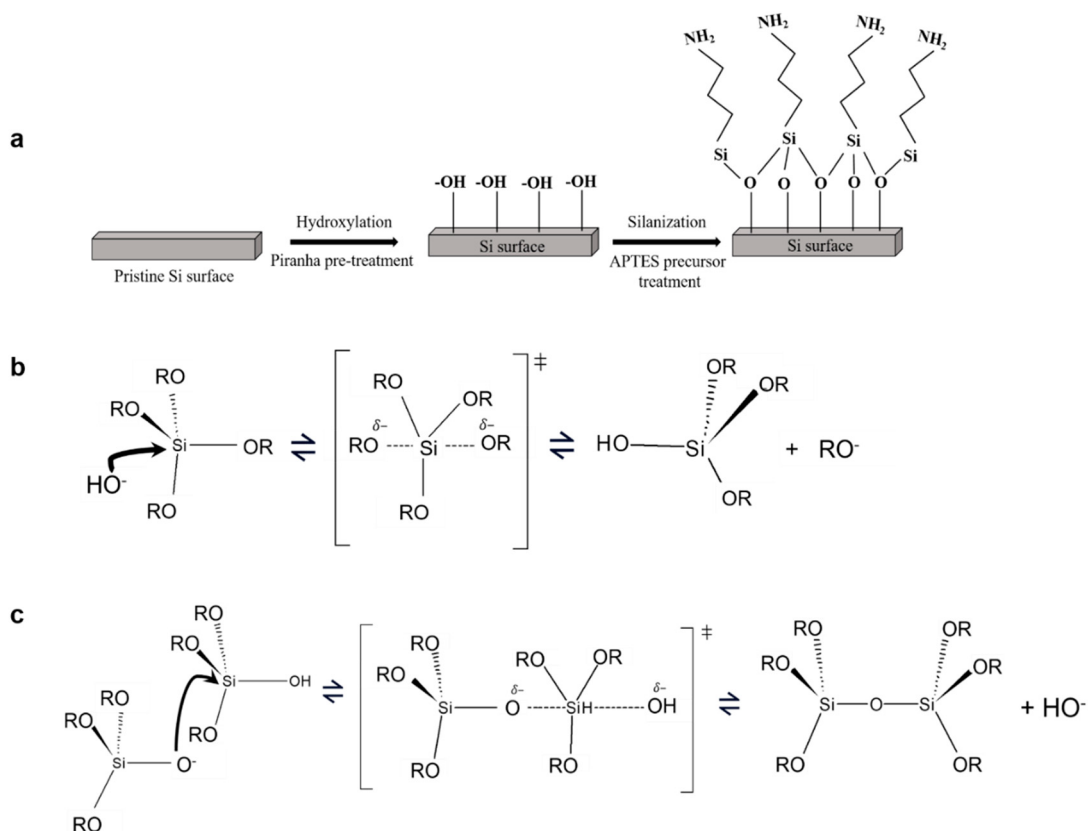

**Figure S2.** (a) Formation of siloxane networks from piranha-treated Si-OH using APTES. (b) Hydrolysis and (c) condensation reaction mechanism of TEOS showing formation of siloxane bridges.

### Hydrolysis Reaction:

APTES reacts with water, leading to the hydrolysis of the ethoxysilane groups. This results in the formation of hydroxyl-modified APTES and ethanol. The presence of hydroxyl groups on APTES is crucial for subsequent condensation reactions.

### Condensation:

Hydroxyl-modified APTES undergoes condensation reactions, forming siloxane bonds on the silica surface. This step contributes to the growth of the silica network.

### Self-catalysis:

Siloxane bonds formed on the silica surface can undergo self-catalysis. In this process, water molecules react with the siloxane bonds, regenerating hydroxyl groups on the silica surface and releasing a hydroxyl-modified APTES.

This self-catalysis step contributes to the continual growth of the silica nanoparticles and ensures the presence of hydroxyl groups on the surface.

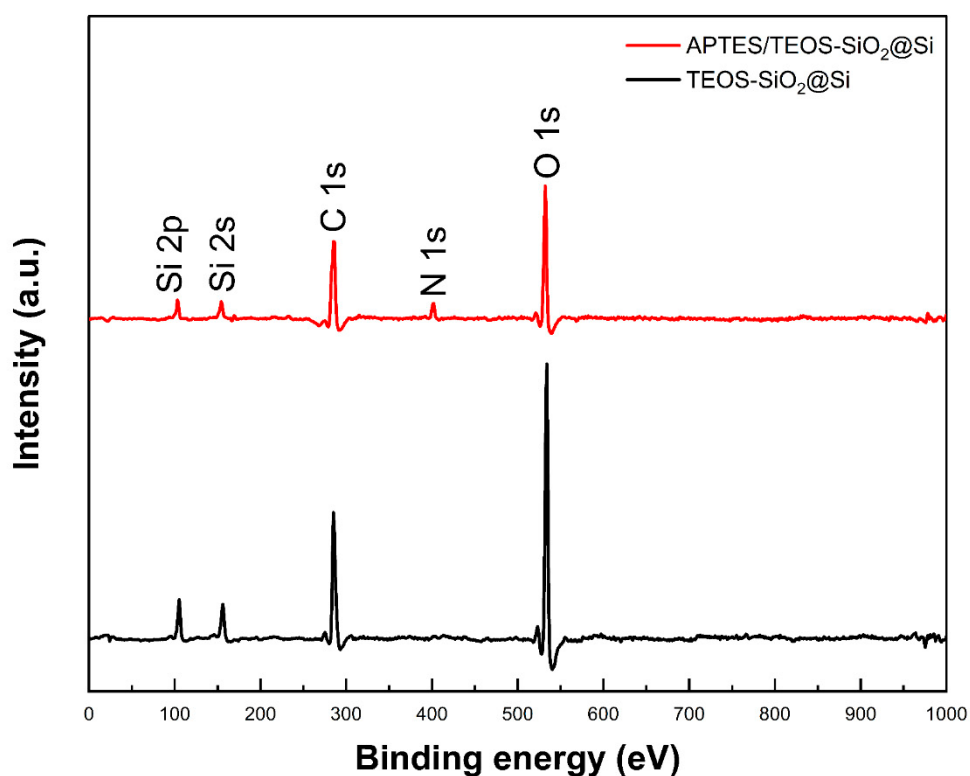

**Figure S3.** XPS survey scan of TEOS-SiO<sub>2</sub>@Si and APTES/TEOS-SiO<sub>2</sub>@Si precursors.

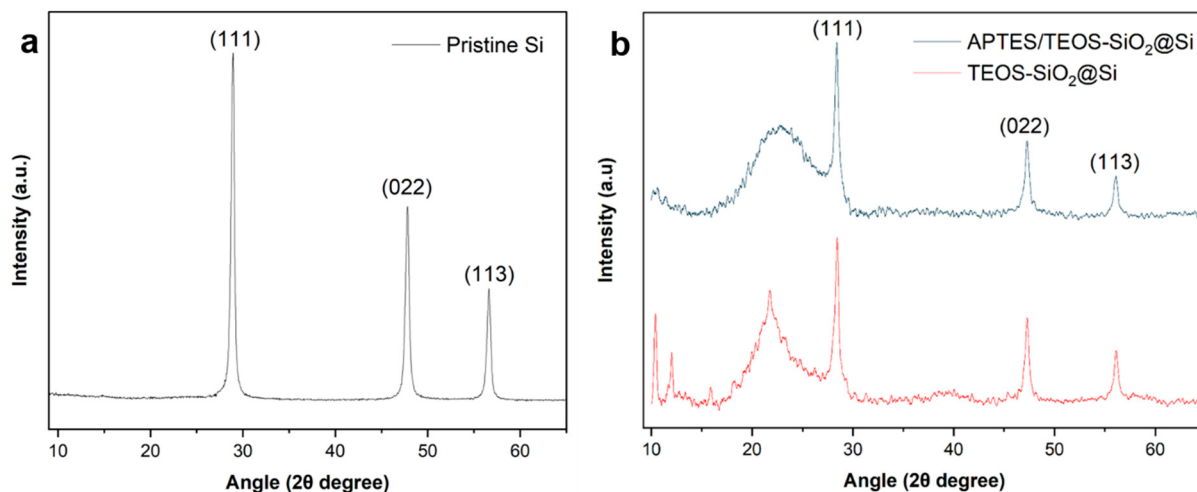

**Figure S4.** XRD patterns of (a) Si and (b) TEOS-derived SiO<sub>2</sub>@Si and APTES/TEOS-derived SiO<sub>2</sub>@Si.

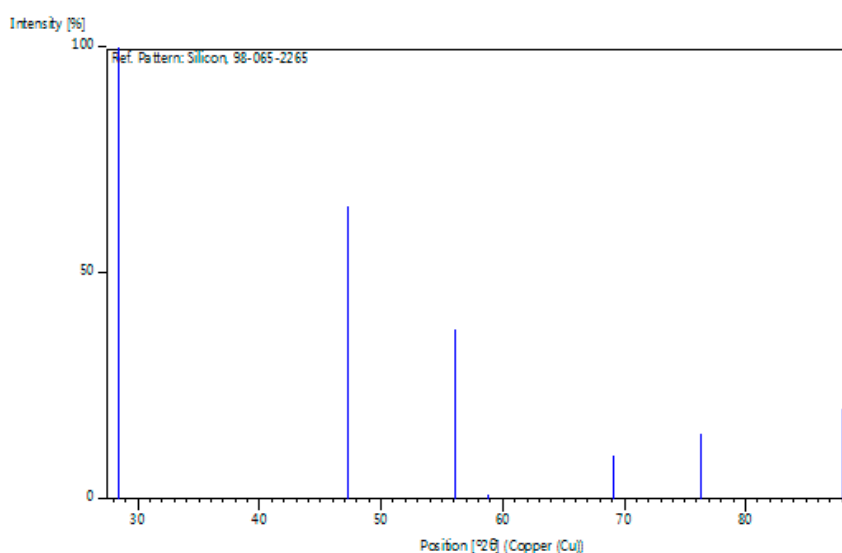

**Figure S5.** XRD reference peaks for face-centered cubic Si crystal (Reference code 98-065-2265)

### Peak list

| No. | $h$ | $k$ | $l$ | $d$ [Å] | $2\theta$ [deg] | $I$ [%] |
|-----|-----|-----|-----|---------|-----------------|---------|
| 1   | 1   | 1   | 1   | 3.13559 | 28.442          | 100.0   |
| 2   | 0   | 2   | 2   | 1.92015 | 47.302          | 65.0    |
| 3   | 1   | 1   | 3   | 1.63751 | 56.122          | 37.8    |
| 4   | 2   | 2   | 2   | 1.56779 | 58.856          | 0.0     |
| 5   | 0   | 0   | 4   | 1.35775 | 69.129          | 9.8     |
| 6   | 1   | 3   | 3   | 1.24596 | 76.375          | 14.4    |
| 7   | 2   | 2   | 4   | 1.10860 | 88.029          | 19.9    |

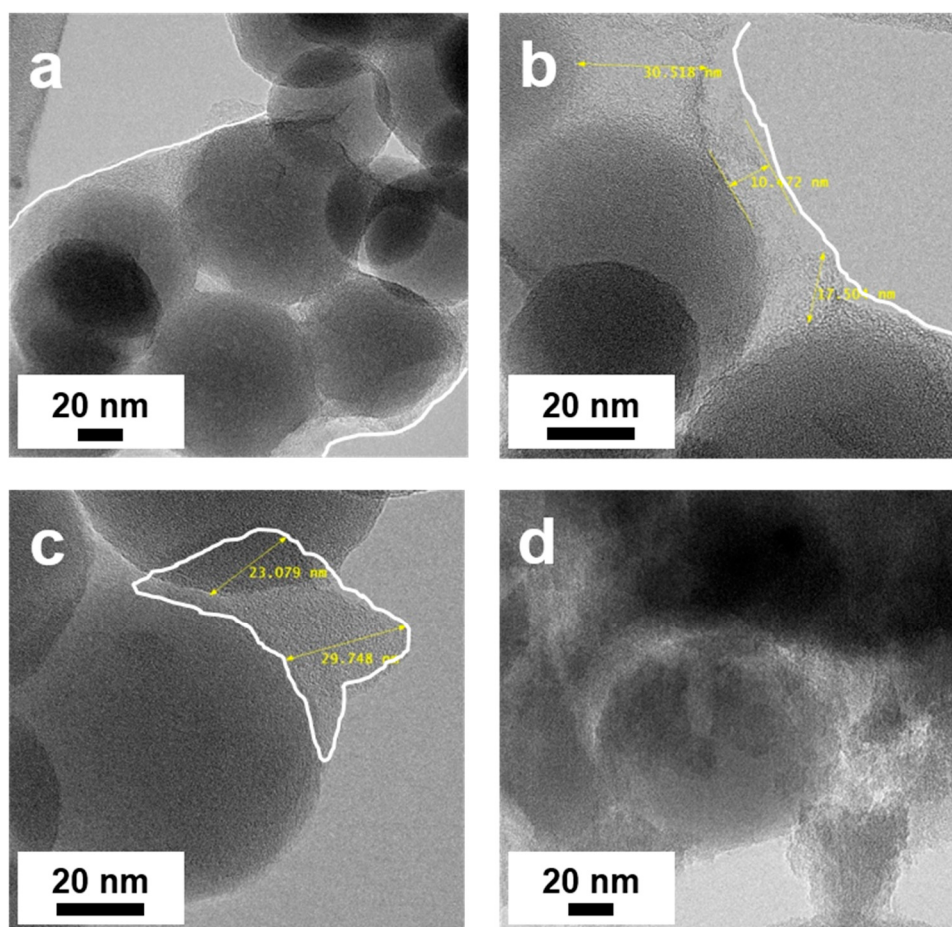

**Figure S6.** TEM images showing carbon crosslinking from PEI and PDA carbon coating efficiency in (a, b) composite samples prepared via traditional  $\text{SiO}_2$  sol-gel synthesis reaction and carbon coating at room temperature and (c, d) composite samples prepared via hydrothermal treatment at 140 °C for 24 h.

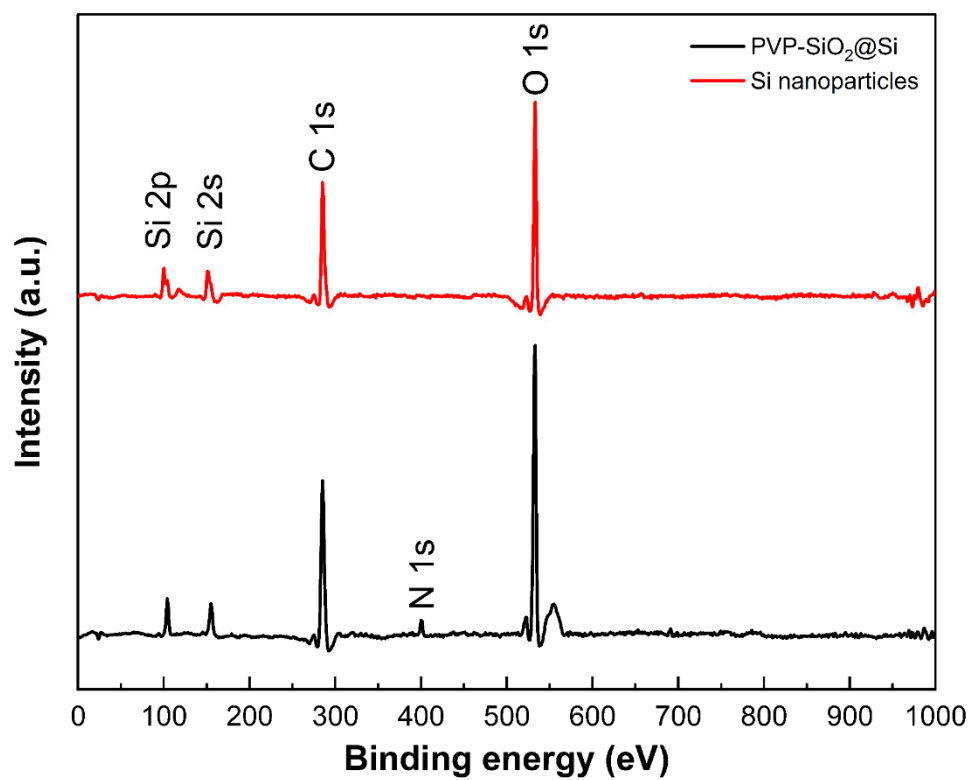

**Figure S7.** XPS survey spectra of PVP-SiO<sub>2</sub>@Si and Si nanoparticles.

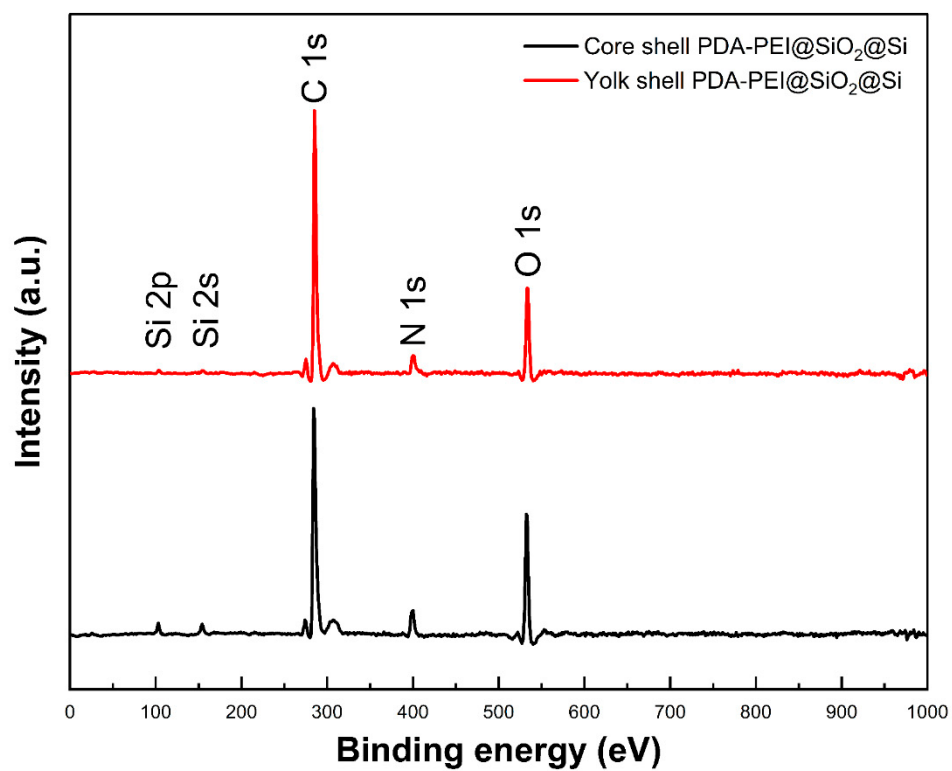

**Figure S8.** XPS survey spectra core shell PDA-PEI@SiO<sub>2</sub>@Si and yolk shell PDA-PEI@SiO<sub>2</sub>@Si composite samples.

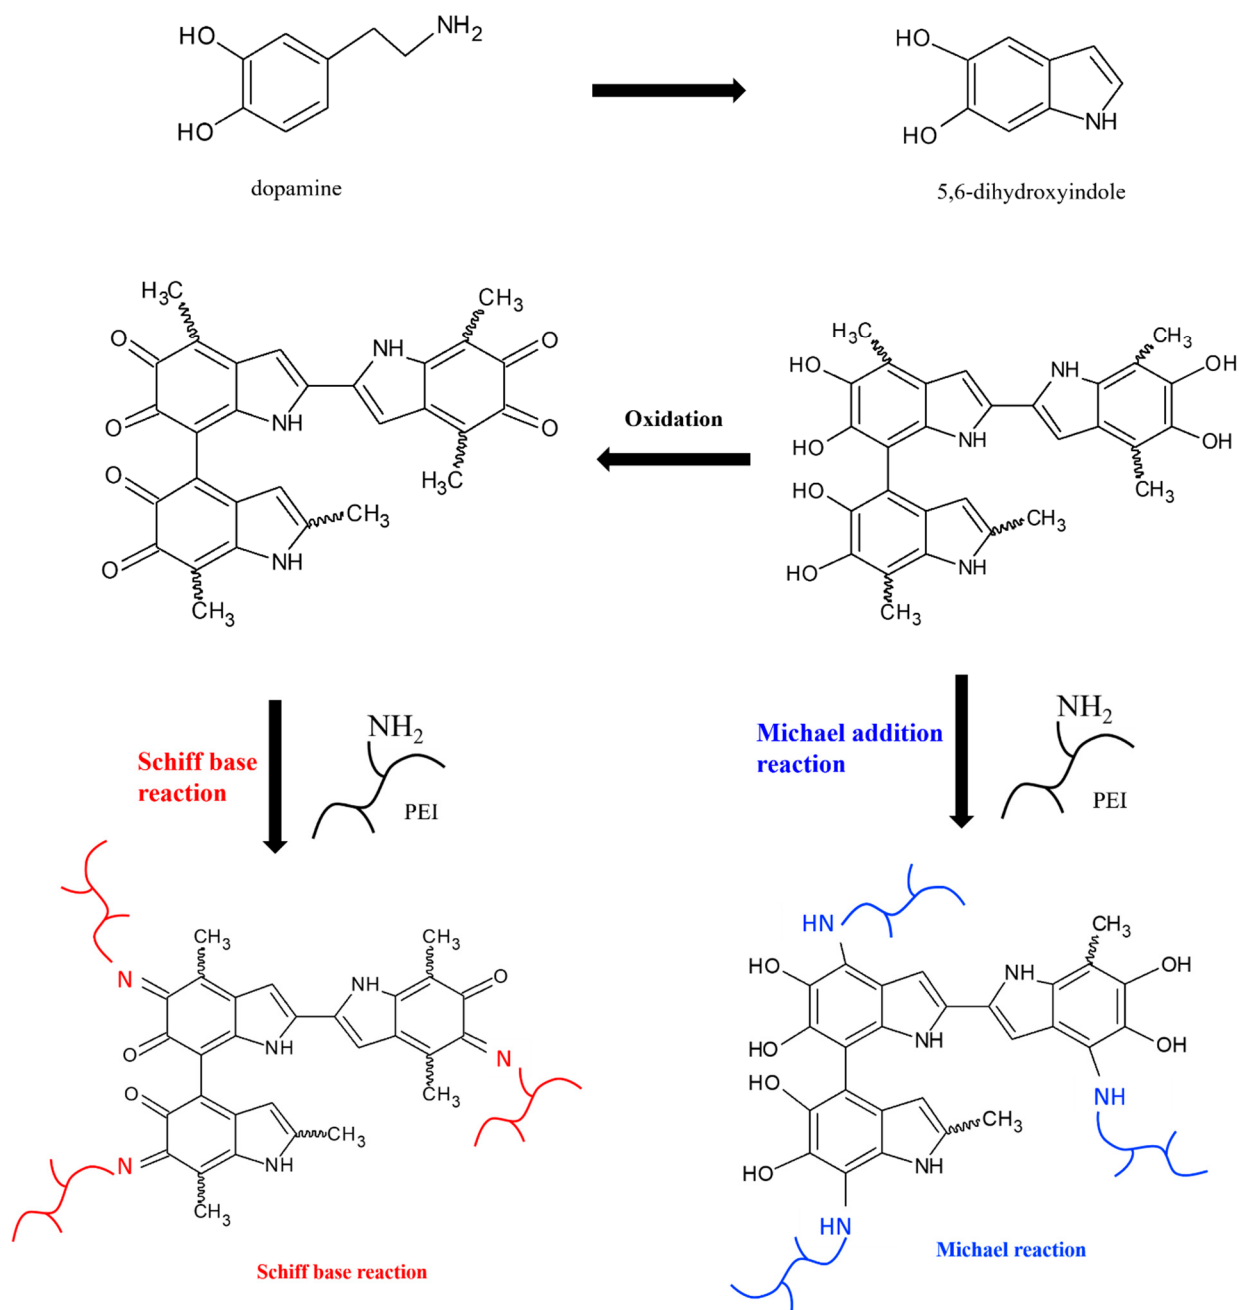

**Figure S9.** Illustration of the two possible reaction mechanisms showing the formation of PDA-PEI carbon crosslinks.

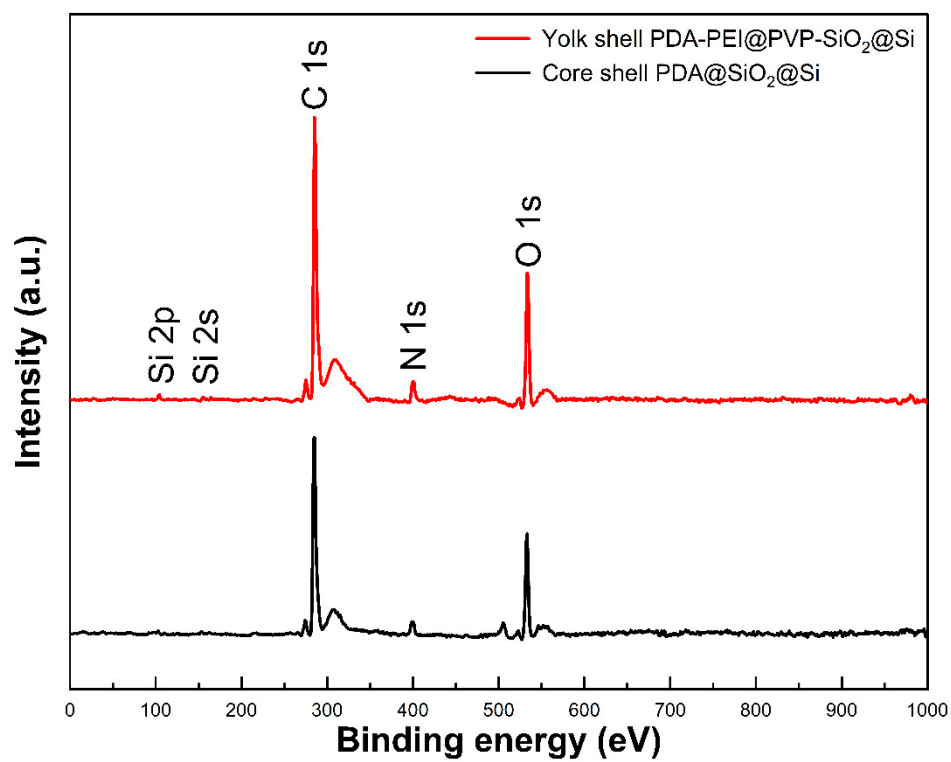

**Figure S10.** XPS survey spectra core shell PDA@SiO<sub>2</sub>@Si and yolk shell PDA-PEI@PVP-SiO<sub>2</sub>@Si composite samples.

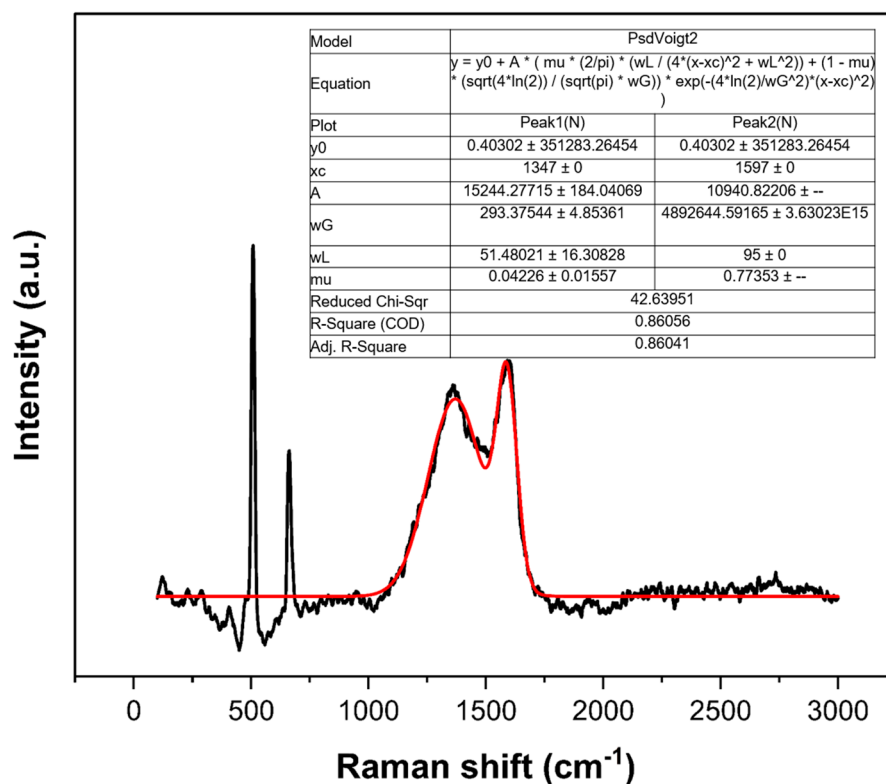

**Figure S11.** Raman peak fitting of core shell PDA@SiO<sub>2</sub>@Si composite sample.

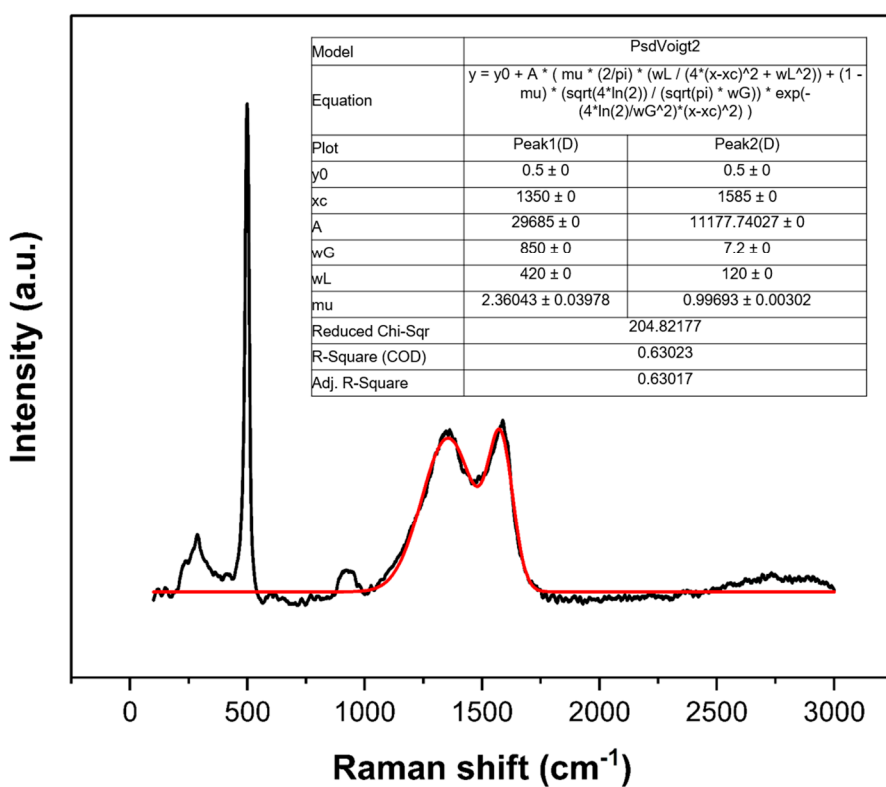

**Figure S12.** Raman peak fitting of yolk shell PDA-PEI@SiO<sub>2</sub>@Si composite sample.

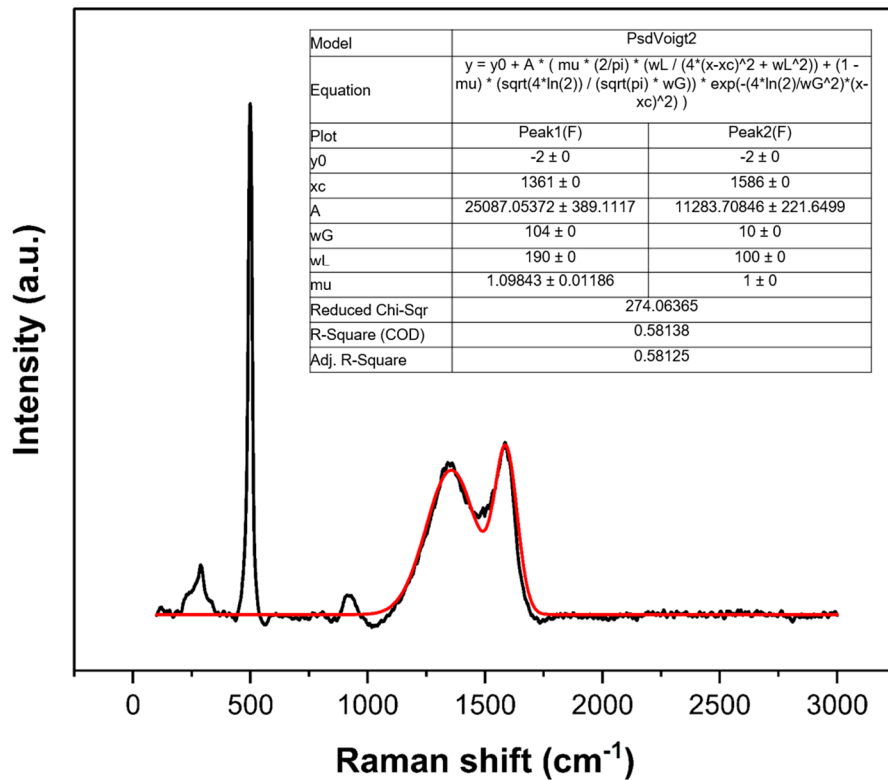

**Figure S13.** Raman peak fitting of yolk shell PDA-PEI@PVP-SiO<sub>2</sub>@Si composite sample.

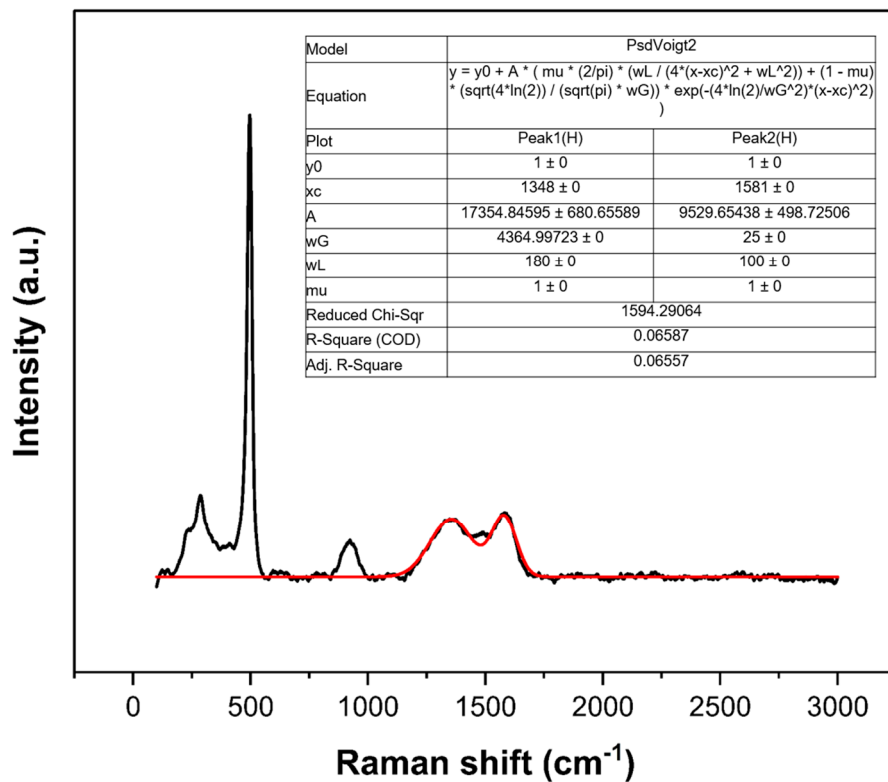

**Figure S14.** Raman peak fitting of core shell PDA-PEI@SiO<sub>2</sub>@Si composite sample.

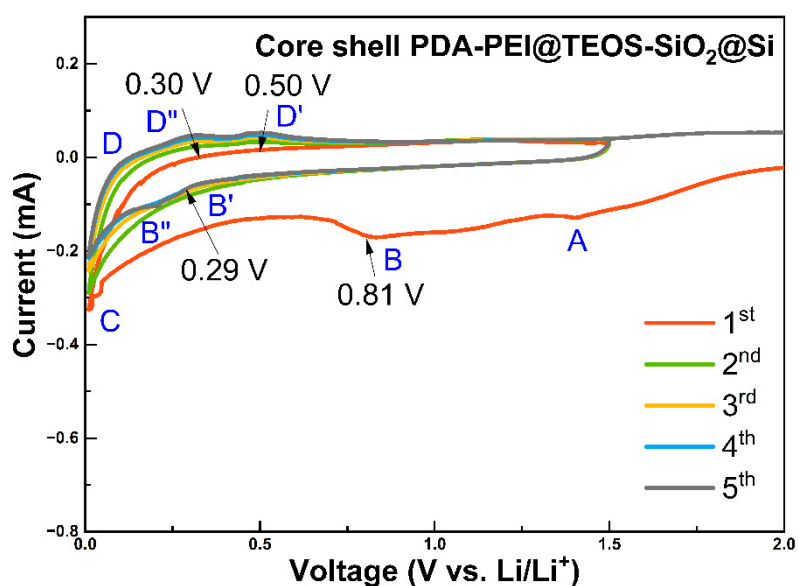

**Figure S15.** CV scans of core shell PDA-PEI@TEOS-SiO<sub>2</sub>@Si composite fabricated via RT using TEOS as precursor solution.

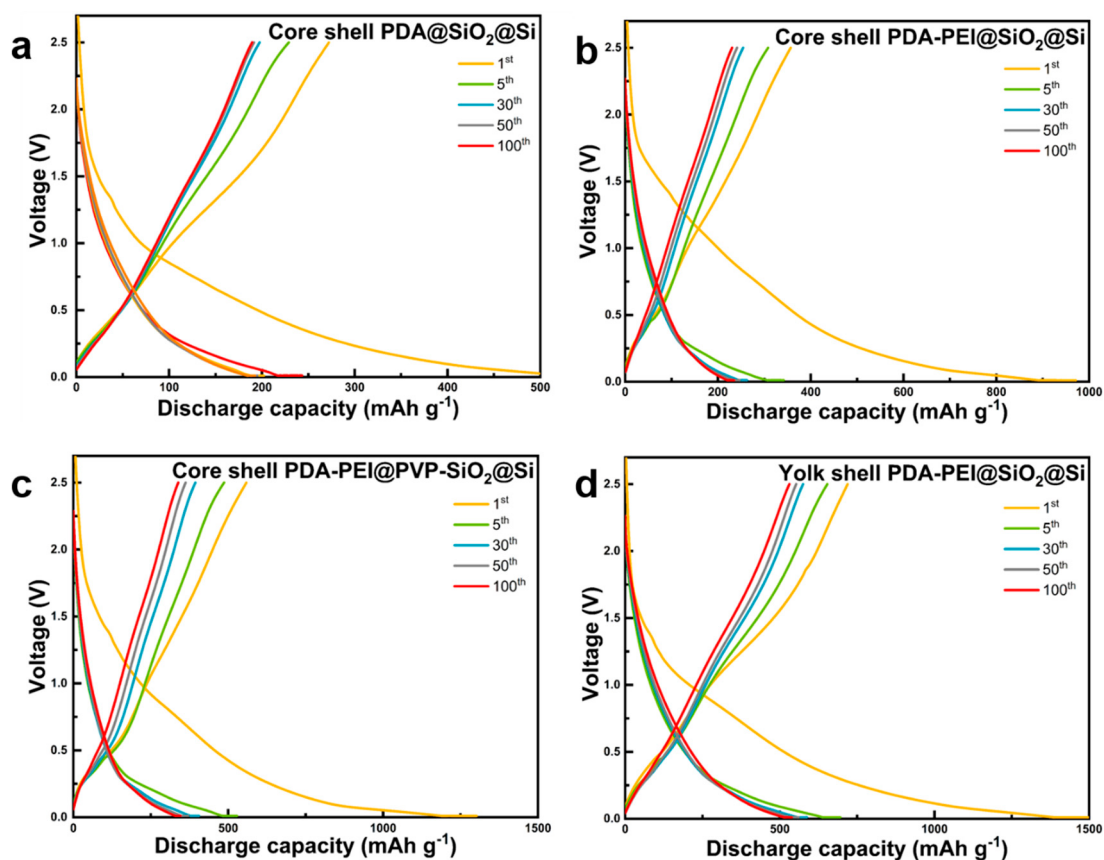

**Figure S16.** Galvanostatic charge and discharge profiles of core shell PDA@SiO<sub>2</sub>@Si (a), core shell PDA-PEI@SiO<sub>2</sub>@Si (b), core shell PDA-PEI@PVP-SiO<sub>2</sub>@Si (c), and yolk shell PDA-PEI@SiO<sub>2</sub>@Si (d) composite samples.

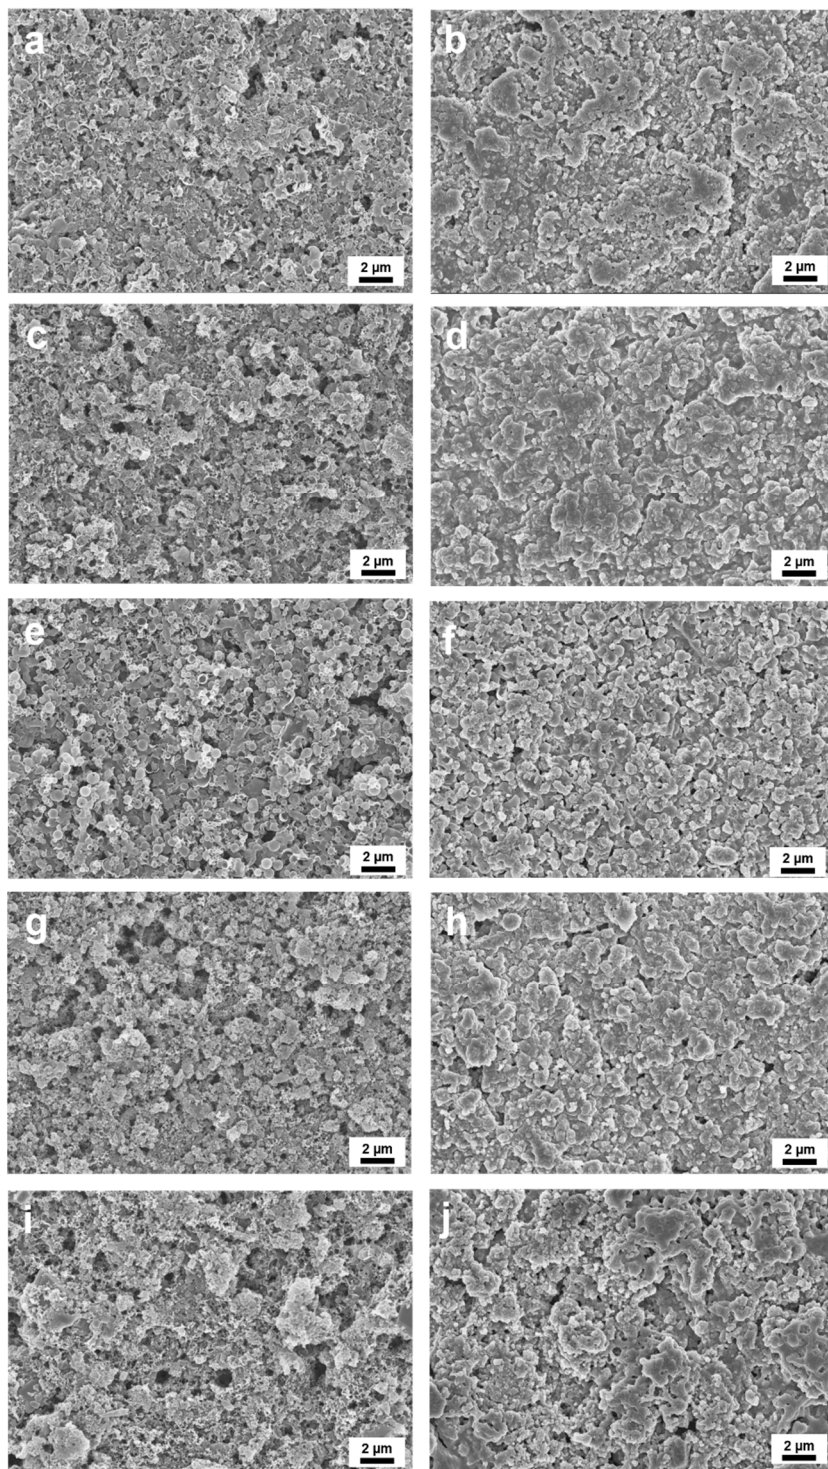

**Figure S17.** Representative SEM images showing the surface morphology of particles in (a, b) yolk shell PDA-PEI@PVP-SiO<sub>2</sub>@Si, (c, d) yolk shell PDA-PEI@SiO<sub>2</sub>@Si, (e, f) core shell PDA-PEI@PVP-SiO<sub>2</sub>@Si, (g, h) core shell PDA-PEI@SiO<sub>2</sub>@Si, and (i, j) core shell PDA@SiO<sub>2</sub>@Si anode (a, c, e, g, i) before and (b, d, f, h, j) after 200 lithiation/delithiation cycles at 1 A g<sup>-1</sup> current density.

**Table S1.** The  $I_D/I_G$  values of the samples calculated by the ratio of the D band peak area to the G band peak area using Gaussian–Lorentzian curve fitting model.

| Sample                                      | D band    |        |        | G band    |        |       | $I_D/I_G$ |
|---------------------------------------------|-----------|--------|--------|-----------|--------|-------|-----------|
|                                             | A         | I      | FWHM   | A         | I      | FWHM  |           |
| Core shell PDA@SiO <sub>2</sub> @Si         | 15244.277 | 1347.0 | 51.480 | 10940.822 | 1597.0 | 95.0  | 0.84      |
| Yolk shell PDA–PEI@SiO <sub>2</sub> @Si     | 29685.0   | 1350.0 | 420.0  | 11177.740 | 1585.0 | 120.0 | 0.85      |
| Yolk shell PDA–PEI@PVP–SiO <sub>2</sub> @Si | 25087.054 | 1361.0 | 190.0  | 11283.708 | 1586.0 | 100.0 | 0.86      |
| Core shell PDA–PEI@SiO <sub>2</sub> @Si     | 17354.846 | 1348.0 | 180.0  | 9529.654  | 1581.0 | 100.0 | 0.85      |

**Table S2.** The porous structure of the representative composite samples described by BJH model of BET analysis.

| Sample                                      | $S_{\text{BET}}$<br>( $\text{m}^2 \text{g}^{-1}$ ) | $S_{\text{me}}^*$<br>( $\text{m}^2 \text{g}^{-1}$ ) | $S_{\text{mi}}^*$<br>( $\text{m}^2 \text{g}^{-1}$ ) | $V_{\text{t}}^*$<br>( $\text{cm}^3 \text{g}^{-1}$ ) |
|---------------------------------------------|----------------------------------------------------|-----------------------------------------------------|-----------------------------------------------------|-----------------------------------------------------|
| Core shell PDA@SiO <sub>2</sub> @Si         | 224.56                                             | 149.66                                              | 177.42                                              | 0.48                                                |
| Core shell PDA-PEI@SiO <sub>2</sub> @Si     | 226.40                                             | 163.77                                              | 202.59                                              | 0.65                                                |
| Core shell PDA-PEI@PVP-SiO <sub>2</sub> @Si | 409.05                                             | 219.13                                              | 337.65                                              | 0.67                                                |
| Yolk shell PDA-PEI@SiO <sub>2</sub> @Si     | 589.83                                             | 321.92                                              | 610.43                                              | 0.13                                                |
| Yolk shell PDA-PEI@PVP-SiO <sub>2</sub> @Si | 654.63                                             | 570.96                                              | 519.09                                              | 0.12                                                |

\* $S_{\text{me}}$ , specific surface area of the mesopores;  $S_{\text{mi}}$ , specific surface area of the micropores;  $V_{\text{t}}$ , the total pore volume.
